# Supplementary material for: Lsm2 and Lsm3 bridge the interaction of the Lsm1-7 complex with Pat1 for decapping activation
Source: PubMed Central journal article supplement — Cell Res. 2013 Nov 19;24(2):233–46. doi: 10.1038/cr.2013.152 (PMC3915908; doi:10.1038/cr.2013.152), 2013-11-19
Supplement: cr2013152x2.pdf [file cr2013152x2.pdf]

## Supplemental information, Table S2. Details of sedimentation velocity data analysis

| Protein | Concentration (mg/ml) | S (from c(S)) | $S_{20,w}^a$ | $f/f_0$ | RMSD <sup>b</sup> | MW <sup>c</sup> from c(M) | Averaged MW(RMSD) |
|---------|-----------------------|---------------|--------------|---------|-------------------|---------------------------|-------------------|
| Lsm2-3  | 0.75                  | 4.733         | 4.968        | 1.350   | 0.006             | 80350                     | 80700 (752)       |
|         | 1.0                   | 4.816         | 5.055        | 1.340   | 0.004             | 81564                     |                   |
|         | 1.5                   | 4.726         | 4.961        | 1.350   | 0.010             | 80187                     |                   |

<sup>a</sup>  $S_{20,w}$  is the sedimentation coefficient with the parameter being corrected to 20.0 °C and the density of water.

<sup>b</sup> RMSD is the root mean square deviation from SEDFIT program fitting.

<sup>c</sup> MW is molecular weight in Dalton.
