# Supplementary material for: Lsm2 and Lsm3 bridge the interaction of the Lsm1-7 complex with Pat1 for decapping activation
Source: PubMed Central journal article supplement — Cell Res. 2013 Nov 19;24(2):233–46. doi: 10.1038/cr.2013.152 (PMC3915908; doi:10.1038/cr.2013.152), 2013-11-19
Supplement: cr2013152x4.pdf [file cr2013152x4.pdf]

## Supplemental information, Figure S2

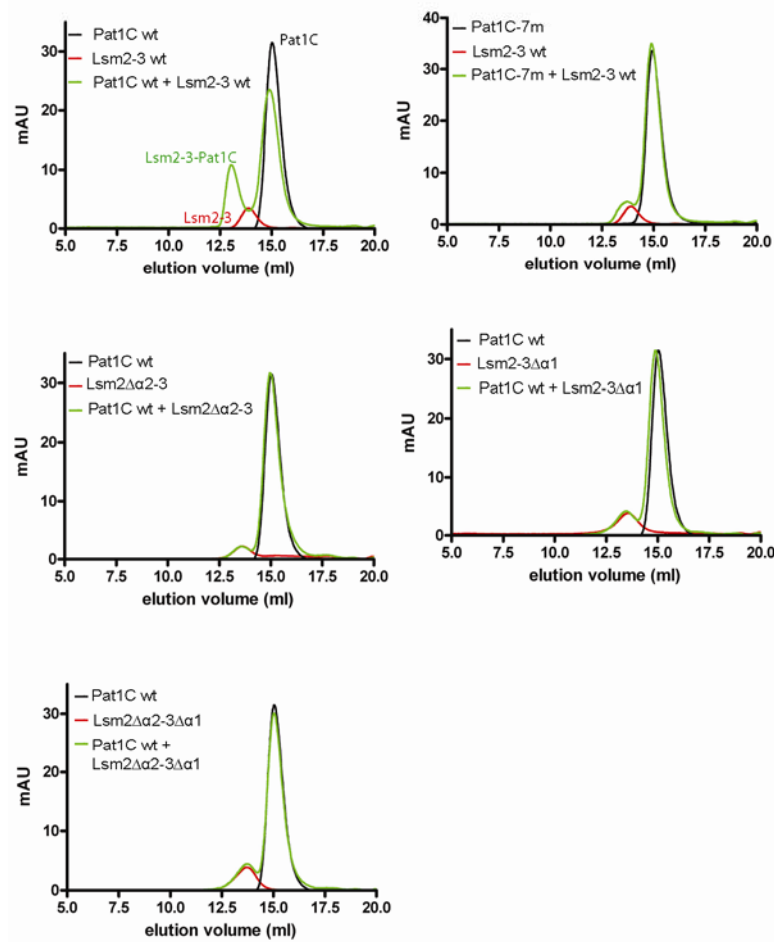

**Figure S2.** Analytical size exclusion chromatography was used to detect the interactions of Pat1C wild type (Pat1C wt) or Pat1C mutant (Pat1C-7m) with Lsm2-3 wild type (Lsm2-3 wt), Lsm2 $\Delta$ 2-3, Lsm2-3 $\Delta$ 1 or Lsm2 $\Delta$ 2-3 $\Delta$ 1.
